# Supplementary material
Source: PubMed Central journal article supplement (PMC3027053)

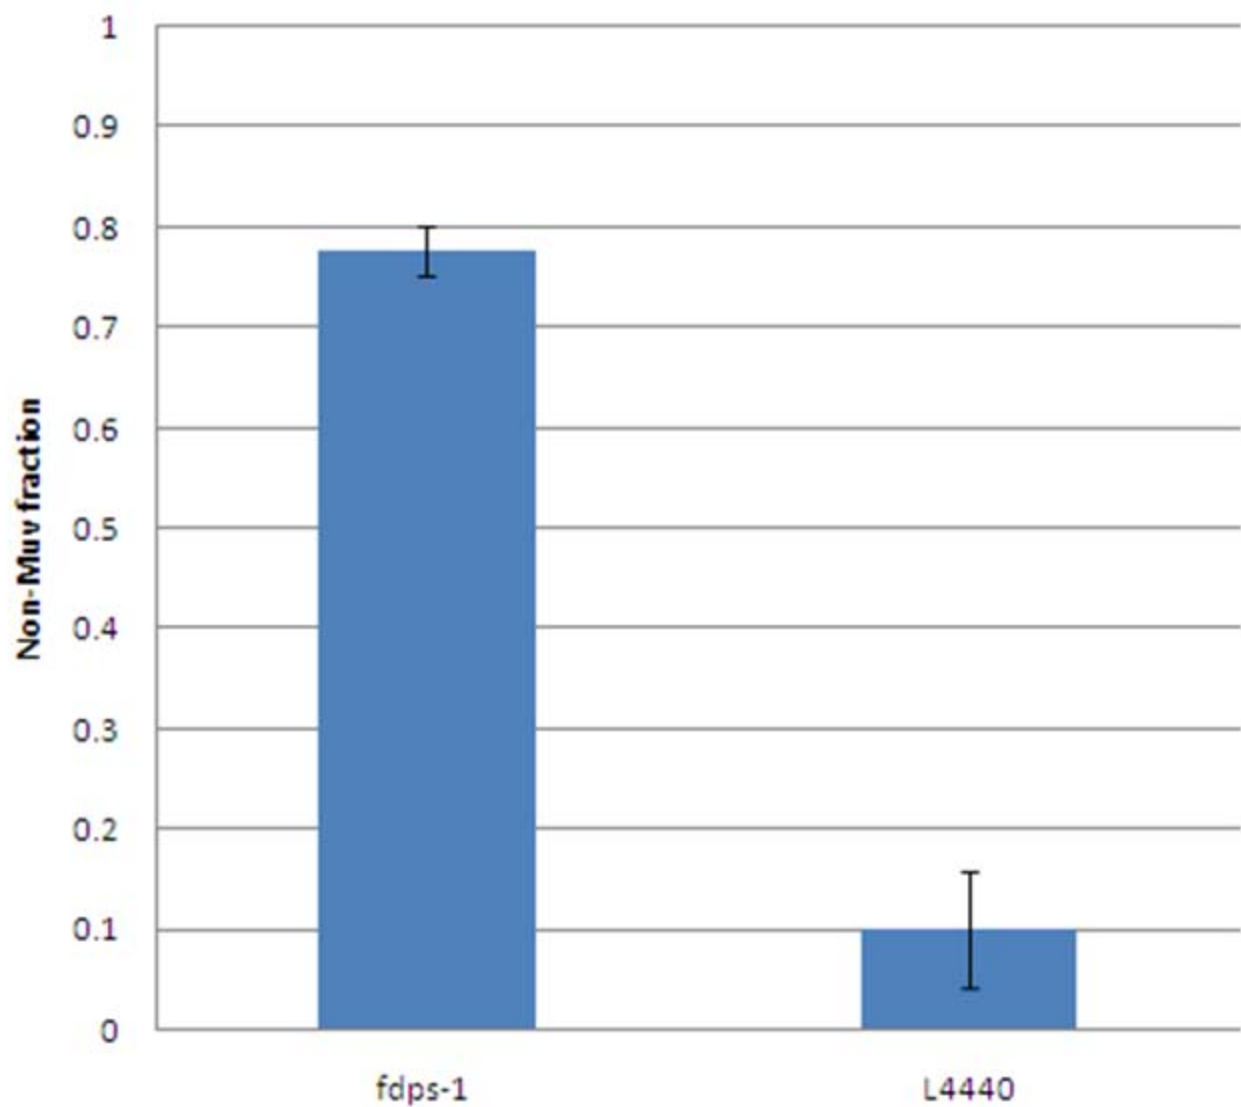

Figure for reviewers:

Multivulva assay was performed as described in (Mitsunobu Hara and Min Han, 1995). Briefly, gravid MT2124 worms were placed on *fdps-1* or empty vector RNAi plates at 20°C, and phenotype was scored in the next generation. Adults with one or more pseudovulvae were classified as Muv.

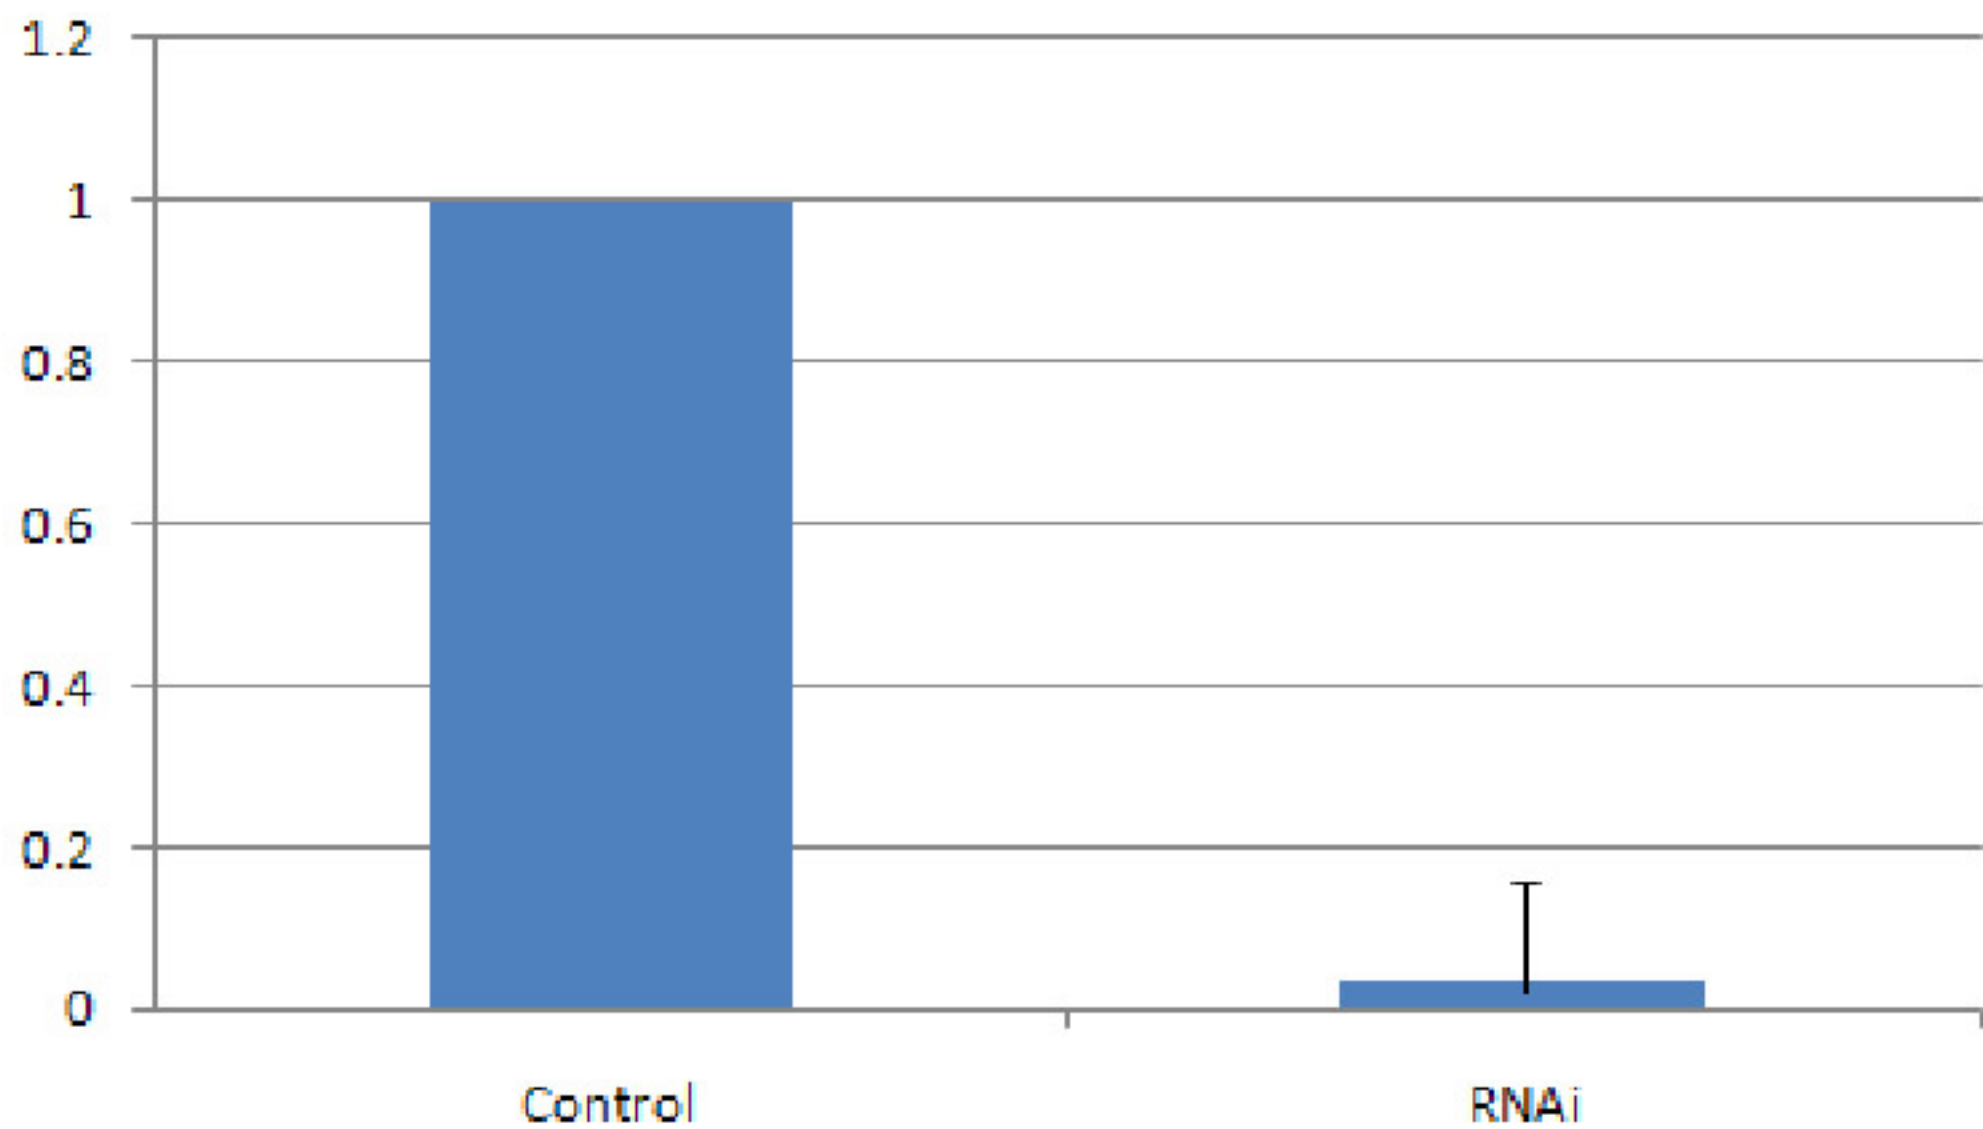

Supplement: nucl0106_0499SD1.pdf [file nucl0106_0499SD1.pdf]
